1 **Short Title: GFP-based cGMP sensor for imaging in an intact animal**

2

3 **Full Title: Robust and sensitive GFP-based cGMP sensor for real time imaging in**  
4 **intact *Caenorhabditis elegans***

5

6 **Authors:** Sarah Woldemariam<sup>1,2</sup>, Jatin Nagpal<sup>3,#a</sup>, Joy Li<sup>4,#b</sup>, Martin W. Schneider<sup>3</sup>,  
7 Raakhee Shankar<sup>4,#c</sup>, Mary Futey<sup>2,#d</sup>, Aruna Varshney<sup>4</sup>, Kristine Andersen<sup>4,#e</sup>, Benjamin  
8 Barsi-Rhyne<sup>6,#b</sup>, Alan Tran<sup>4,#f</sup>, Wagner Steuer Costa<sup>3</sup>, Chantal Brueggemann<sup>2,#g</sup>, O.  
9 Scott Hamilton<sup>5</sup>, Denise M. Ferkey<sup>6</sup>, Miri VanHoven<sup>4</sup>, Alexander Gottschalk<sup>3</sup>, Noelle  
10 L'Etoile<sup>2,\*</sup>

11

12 **Affiliations:**

13 <sup>1</sup> Chemistry and Chemical Biology Graduate Program, University of California, San  
14 Francisco, San Francisco, CA 94158

15 <sup>2</sup> Department of Cell and Tissue Biology, University of California, San Francisco, San  
16 Francisco, CA 94143

17 <sup>3</sup> Department of Membrane Molecular Biology and Neurobiology, The Goethe University,  
18 Frankfurt, Germany

19 <sup>4</sup> Department of Biological Sciences, San Jose State University, San Jose, CA 95192

20 <sup>5</sup> Center for Neuroscience, University of California, Davis, Davis, CA 95618

21 <sup>6</sup> Department of Biology, State University of New York at Buffalo, Buffalo, NY 14260

22 <sup>#a</sup>Current Address: German Resilience Center, University Medical Center of the  
23 Johannes Gutenberg University Mainz, Mainz, Germany

24 #<sup>b</sup>Current Address: Tetrad Graduate Program, University of California, San Francisco,  
25 San Francisco, CA 94158

26 #<sup>c</sup>Current Address: Cellular and Molecular Biology Program, University of Wisconsin –  
27 Madison, Madison, WI 53706

28 #<sup>d</sup>Current Address: Faculty for International Students, Lobachevsky University, Nizhny  
29 Novgorod, Russia

30 #<sup>e</sup>Current Address: Peace Corps, Moshi Town, Tanzania

31 #<sup>f</sup>Current Address: School of Pharmacy, University of California, San Francisco, San  
32 Francisco, CA 94143

33 #<sup>g</sup>Current Address: European Molecular Biology Laboratory, Heidelberg, Germany

34

35 \*Corresponding author

36 E-mail: [noelle.letoule@ucsf.edu](mailto:noelle.letoule@ucsf.edu)

37

### 38 **Abstract**

39 cGMP is a ubiquitous second messenger that plays a role in sensory signaling and  
40 plasticity through its regulation of ion channels and kinases. Previous studies that  
41 primarily used genetic and biochemical tools suggest that cGMP is spatiotemporally  
42 regulated in multiple sensory modalities, including light, heat, gases, salt and odor. FRET-  
43 and GFP-based cGMP sensors were developed to visualize cGMP in primary cell culture  
44 and *Caenorhabditis elegans* to corroborate these findings. While a FRET-based sensor  
45 has been used in an intact animal to visualize cGMP, the requirement of a multiple  
46 emission system limits its ability to be used on its own as well as with other sensors and

47 fluorescent markers. Here, we demonstrate that WincG2, a codon-optimized version of  
48 the cpEGFP-based cGMP sensor FlincG3, can be used in *C. elegans* to visualize rapidly  
49 changing cGMP levels in living, behaving animals using a single fluorophore. We  
50 coexpressed the sensor with the blue light-activated guanylyl cyclases BeCyclOp and  
51 bPGC in body wall muscles and found that the rate of WincG2 fluorescence correlated  
52 with the rate of cGMP production by each cyclase. Furthermore, we show that WincG2  
53 responds linearly upon NaCl concentration changes and SDS presentation in the cell  
54 bodies of the gustatory neuron ASER and the nociceptive phasmid neuron PHB,  
55 respectively. Intriguingly, WincG2 fluorescence in the ASER cell body decreased in  
56 response to a NaCl concentration downstep and either stopped decreasing or increased  
57 in response to a NaCl concentration upstep, which is opposite in sign to previously  
58 published calcium recordings. These results illustrate that WincG2 can be used to report  
59 rapidly changing cGMP levels in an intact animal and that the reporter can potentially  
60 reveal unexpected spatiotemporal landscapes of cGMP in response to stimuli.

61

## 62 **Author Summary**

63 cGMP is a second messenger that plays an important role in sensory signaling and neural  
64 plasticity. Previous genetic and biochemical studies indirectly suggest that cGMP is  
65 spatiotemporally regulated in neurons to modulate neural activity. While a FRET-based  
66 sensor for cGMP has been used in intact *Caenorhabditis elegans* to examine its  
67 spatiotemporal regulation in neurobiological processes, its use has been limited due to  
68 the complicated setup required to image this type of sensor. Here, we describe a GFP-  
69 based cGMP sensor that has been codon optimized for use in *C. elegans* and

70 demonstrate that it responds robustly and reliably to endogenously changing cGMP  
71 levels. We show that the sensor responds to cGMP production by coexpressing it with  
72 blue light-activated guanylyl cyclases, and we show that it responds to NaCl and sodium  
73 dodecyl sulfate when expressed in a gustatory and nociceptive neuron, respectively. We  
74 think that this sensor can be used to investigate the spatiotemporal regulation of cGMP  
75 in neurons and its relationship to neural activity.

76

## 77 **Introduction**

78 The canonical second messenger molecule cGMP (cyclic guanosine  
79 monophosphate) regulates richly diverse functions in an animal's nervous system. cGMP  
80 signaling underlies the outgrowth of axons and the transduction of light, scent and other  
81 environmental cues to electrical signals in the brain [1]. Because so many neurobiological  
82 processes revolve around cGMP, having a robust, easy to use visual reporter for cGMP  
83 with precise temporal and spatial fidelity is critical to complement the primarily  
84 pharmacological, biochemical and genetic approaches used to study this second  
85 messenger's role in these processes. Such a reporter can be used to illuminate how  
86 producers and regulators of cGMP shape the landscape of this cyclic nucleotide in  
87 neurons.

88 Since cGMP is used in diverse cell types as a second messenger, its levels need  
89 to be regulated in ways that serve the cells' distinct functions. cGMP production can be  
90 regulated directly by stimuli such as ions, peptides, temperature and gases that interact  
91 with guanylyl cyclases (GCs) that convert GTP to cyclic GMP [2–8]. Recent evidence  
92 suggests that stimuli such as ions, peptides,  $G\alpha$  and temperature appear to largely

93 regulate transmembrane receptor guanylyl cyclases (rGCs), while membrane permeable  
94 gases such as nitric oxide, carbon dioxide and oxygen have been shown to directly  
95 activate soluble guanylyl cyclases (sGCs) [6–8]. Opposing the activity of GCs are  
96 phosphodiesterases (PDEs) that hydrolyze cGMP; they can be regulated by cGMP,  
97 cAMP,  $\text{Ca}^{2+}$ , kinases and the  $\gamma$  subunit of heteromeric G proteins [9–11]. cGMP effectors,  
98 including cyclic nucleotide-gated channels and kinases, can act rapidly by changing the  
99 membrane potential of a cell (e.g. the visual system); they can also have slower, more  
100 long lasting effects on gene expression [12,13]. Thus, the precise subcellular localization  
101 of GC and PDE proteins and their temporally regulated activities are likely to produce a  
102 complex and dynamic landscape of varying cGMP levels and restricted localized  
103 activation of effector proteins.

104 In neurobiology, the spatial localization of cGMP signal transduction pathways  
105 suggest that spatiotemporal regulation of cGMP could play a role in sensory transduction  
106 and plasticity, which is likely to be different in distinct neurons [14,15]. To this end, the  
107 transparent nematode *C. elegans* is an ideal model system to visualize cGMP in  
108 neurobiological processes. While the use of genetic manipulations in this animal yielded  
109 valuable insights into the role of cGMP in sensory transduction, a visual tool that  
110 complements this approach has the potential to reveal how this neuromodulator is  
111 spatiotemporally regulated in real time. For instance, while mutants lacking distinct,  
112 functional rGCs revealed that cGMP signaling was required for sensing specific gustatory  
113 cues and NaCl concentration cultivation preference in *C. elegans*, it is unclear whether  
114 this second messenger is spatiotemporally regulated [3,4,16]. Additionally, while genetic  
115 evidence suggests that the cGMP-dependent protein kinase EGL-4 and GCs regulate *C.*

116 *C. elegans*' sensitivity to quinine through the flow of cGMP from sensory neurons to the  
117 nociceptive neuron ASH through gap junctions [17,18], a visual tool could greatly enhance  
118 our understanding of the process and its dynamics. In another nociceptive neuron, PHB,  
119 genetic evidence suggests that the G protein coupled receptor *srb-6* is required to sense  
120 noxious liquids including sodium dodecyl sulfate (SDS) and dodecanoic acid [19], and  
121 calcium recordings suggest that avoidance of isoamyl alcohol is at least partially mediated  
122 by the cGMP-gated cation channel TAX-2/TAX-4, both suggesting that cGMP flux is  
123 required for sensing some nociceptive cues [20]. Thus, genetic tools demonstrate the  
124 importance of cGMP signaling in distinct sensory modalities, and a tool to visualize cGMP  
125 fluxes with precise temporal and spatial fidelity could deepen our understanding of these  
126 important processes, offering a more complete picture of the cGMP landscape and  
127 dynamics in cells. Such a tool will provide an essential complementary approach to the  
128 primarily genetic approaches that have been used to examine cGMP dynamics in this  
129 animal [21].

130         Though a Förster resonance energy transfer (FRET)-based tool has been used to  
131 this end, a single channel fluorophore tool provides additional flexibility as it would allow  
132 for more wavelengths to be used, making it more amenable for visualization with other  
133 reporters (e.g. calcium sensors and fluorescent markers for organelles). In AWC, this  
134 FRET-based sensor showed compartmentalized cGMP dynamics in response to  
135 odorants [22]. Additionally, in PQR, simultaneous imaging of the cGMP sensor with a  
136 calcium sensor in response to a 7% to 21% increase in O<sub>2</sub> revealed that a decrease in  
137 cGMP correlated with an increase in Ca<sup>2+</sup>, suggesting potential compartmentalization of  
138 cGMP dynamics [8]. While these studies demonstrate that the FRET-based sensor can

139 be used to visualize the cGMP landscape in neurons, the complexity of a multiple  
140 emission system might raise a barrier to its use. Thus, having a robust, single fluorophore  
141 sensor for cGMP will complement the use of calcium sensors in this animal, providing a  
142 way to investigate how the spatiotemporal regulation of cGMP influences neural activity  
143 *in vivo*. Such a tool would be maximally efficient for probing the interplay between cGMP  
144 and calcium dynamics within sensory compartments in this transparent organism.

145 Here, we show that WincG2 (**W**orm **I**ndicator of **cGMP** – **2**), the *C. elegans* codon-  
146 optimized version of the GFP-based circularly permuted cGMP sensor FlincG3, reports  
147 cGMP dynamics *in vivo* in *C. elegans* [23]. We characterize the biochemical and  
148 biophysical properties of WincG2 upon cGMP binding *in vivo* by ectopically expressing  
149 the blue light- activated guanylyl cyclases BeCyclOp and bPGC in muscle cells [24].  
150 Using the WincG2 reporter, we show for the first time that sensory stimulation of either  
151 gustatory or nociceptive neurons triggers cGMP changes. We demonstrate that cGMP  
152 reliably decreases in response to NaCl concentration downsteps and increases in  
153 response to NaCl concentration upsteps in the salt-sensing neuron, ASER, which is  
154 opposite in sign to calcium transients that increase in response to NaCl concentration  
155 downsteps [3,25,26]. Additionally, we demonstrate that cGMP flux can be observed in the  
156 phasmid PHB neurons in response to a repulsive stimulus. Our results demonstrate that  
157 the GFP-based WincG2 is a versatile tool for the study of cGMP dynamics in different  
158 sensory modalities in intact animals using a single fluorophore.

159

## 160 **Results**

161 **WincG2 is a codon-optimized circularly permuted cGMP sensor derived from the**  
162 **mammalian sensor, FlnG3**

163 WincG2, a genetically-encoded, circularly permuted EGFP-based cGMP sensor, is the  
164 *C. elegans* codon-optimized version of FlnG3, which was initially characterized both *in*  
165 *vitro* and in cell lines [23]. FlnG3 is based on FlnG, an earlier version of the sensor.  
166 Like FlnG, FlnG3 contains the N-terminal region of protein kinase G (PKG) I  $\alpha$ , which  
167 is comprised of two cGMP-binding domains that bind cGMP cooperatively. The first 77  
168 amino acids of the N-terminal region of the cGMP-binding domain were deleted to prevent  
169 interactions with endogenous PKG [27]. This region of PKG I  $\alpha$  is appended to the N-  
170 terminus of circularly permuted EGFP (cpEGFP) [23,27]. In the presence of cGMP,  
171 FlnG3 fluorescence increases, presumably due to the conformational changes of the  
172 sensor upon cGMP binding that allow the beta barrel of GFP to form and create the  
173 appropriate environment for fluorophore maturation [23,27]. The response amplitude of  
174 the FlnG3 sensor to cGMP was enhanced by a M335K substitution located outside the  
175 beta barrel of the cpEGFP domain (Fig 1) [23]. FlnG exhibits rapid kinetics, and FlnG3  
176 retains this property as it rapidly detects changes in endogenous cGMP levels in the  
177 nanomolar to low micromolar range in response to nitric oxide when expressed in  
178 HEK<sub>GC</sub>/PDE5 cells [23,27]. Additionally, FlnG3 fluorescence increases *in vitro* in response  
179 to a 230-fold lower concentration of cGMP than cAMP, suggesting that it preferentially  
180 binds to cGMP [23]. For our study we codon optimized FlnG3 for *C. elegans* and  
181 inserted it into a standard *C. elegans* expression vector (Fig 1).

182



183 **Stimulation of blue light-activated guanylyl cyclases increases WincG2**  
184 **fluorescence**

185 To test whether WincG2 can detect rapid changes in cGMP levels in an intact  
186 animal, we utilized the *C. elegans* body wall muscle cells, which lack most endogenous  
187 GCs. We coexpressed the reporter along with heterologous light-inducible GCs that have  
188 different cGMP production rates [24,28]. BeCyclOp is a microbial rhodopsin from  
189 *Blastocladia emersonii* that is linked to a cytosolic GC domain (Fig 2A). It detects  
190 photons by absorption using the retinal chromophore and transmits this signal into  
191 activation of the GC domain [24]. bPGC (*Beggiatoa sp.* photoactivated guanylyl cyclase)  
192 is a BLUF-domain photosensor that is coupled to a GC domain (Fig 2C). It originates from  
193 bPAC (*Beggiatoa sp.* photoactivated adenylyl cyclase) that was mutated to generate  
194 cGMP rather than cAMP [28].

195 To test whether changes in WincG2 fluorescence and dynamics correspond with  
196 cGMP production by BeCyclOp, animals coexpressing WincG2 and BeCyclOp were  
197 grown with or without all-*trans* retinal (ATR), which is required for BeCyclOp activity.  
198 When WincG2 and BeCyclOp were coexpressed in body wall muscle cells in the  
199 presence of ATR, an acute increase in WincG2 fluorescence (peak  $F-F_0/F_0 = 0.218 \pm$   
200  $0.023$  at 0.49s) was observed upon continuous blue light illumination, which activates  
201 BeCyclOp. This was followed by a slight decay over the duration of the recording (Fig 2B:  
202 top green trace). By contrast, animals grown without ATR and thus having no BeCyclOp  
203 activation exhibited an apparent decrease in WincG2 fluorescence ( $F-F_0/F_0$  plateaued at  
204 approximately  $-0.310$  to  $-0.312$  beginning at 8.98s) when exposed to blue light (Fig 2B:  
205 bottom blue trace). The initial signal decayed;  $F-F_0$  became negative, then plateaued and

206 remained steady for the duration of the recording. Notably, the initial fluorescence  
207 intensity  $F_0$  (as measured in the absence of the rhodopsin cofactor ATR; bottom blue trace  
208 in Fig 2B) exhibited a rapid drop, possibly due to photoswitching behavior that was  
209 previously observed for other fluorescent proteins [29,30]. Taken together, we interpret  
210 these results to indicate that WincG2 fluorescence correlates with activation of BeCyclOp  
211 by blue light.

212 bPGC, a blue light-activated GC derived from the corresponding adenylyl cyclase  
213 bPAC (also known as BlaC), produces 50-fold less cGMP per unit time relative to  
214 BeCyclOp [24,28]. WincG2 fluorescence increased in the order of minutes upon  
215 continuous activation of bPGC with blue light (peak  $F-F_0/F_0 = 0.122 \pm 0.023$  at 145.2 s)  
216 (Fig 2D). Note that at the onset of blue light illumination, WincG2 fluorescence increased,  
217 then decreased rapidly; this is presumably the same rapid photoswitching observed in the  
218 BeCyclOp experiment (the time constants for decay of the signal were essentially  
219 identical: 0.383 s for the experiment in Fig 2B, and 0.297 for the experiment in Fig 2D, in  
220 line with the hypothesis that this due to the same photophysical process). We chose  $F_0$   
221 after this photoswitching at 1 second after light onset (Fig 2D: inset). At this time,  
222 meaningful amounts of cGMP begin to develop, as judged from experiments in which  
223 bPGC was coexpressed in body wall muscle with the cGMP-gated cation channel TAX-  
224 2/TAX-4; muscle contractions from ion influx begin to be observable after 1 second of  
225 blue light (S1 Fig).

226 After photoswitching, we observed a slow rise in WincG2 fluorescence, which we  
227 interpret to be due to the slower kinetics of bPGC relative to BeCyclOp. By contrast,  
228 WincG2 fluorescence increased acutely upon activation of BeCyclOp, suggesting that the

229 rate of change of WincG2 fluorescence correlates with the rate of cGMP production by  
230 each GC.

231 Bhargava *et al.* showed that FlincG3 has a 230-fold lower EC<sub>50</sub> for cGMP relative  
232 to cAMP [23]. To assess whether WincG2 fluorescence changes with increasing cAMP  
233 levels *in vivo*, WincG2 was coexpressed with bPAC, a bacterial blue light-activated  
234 adenylyl cyclase, in body wall muscle cells (Fig 2E) [31]. Following a fast drop in  
235 fluorescence, these animals showed a 10% increase in WincG2 fluorescence upon blue  
236 light stimulation of bPAC that peaked and decayed in a manner similar to that of the  
237 WincG2 response to BeCyclOp, albeit with slightly slower kinetics (Fig 2F). Thus, WincG2  
238 appears to respond to cAMP. Indeed, bPAC is an efficient adenylyl cyclase that produces  
239 cAMP at the rate of  $10 \pm 2$  nmol per minute per mg. Thus, it is not surprising that WincG2  
240 responds to the high production of cAMP by bPAC [31]. Since there are no amino acid  
241 changes between WincG2 and FlincG3, it is expected that WincG2 is also activated more  
242 effectively by cGMP relative to cAMP. However, these results indicate that it is important  
243 to control for WincG2 response to cAMP.

#### 244 **WincG2 fluorescence in ASER cell body changes in response to NaCl** 245 **concentration steps and depends on the rGC GCY-22**

246 Genetic and calcium imaging studies indirectly suggest that cGMP in the gustatory  
247 neuron ASER mediates both acute sensation of NaCl removal and the food-mediated  
248 gradual resetting of NaCl cultivation preference [16,25]. ASER expresses multiple rGCs  
249 and may use cGMP to gate the cyclic nucleotide-gated TAX-2/TAX-4 cation channel upon  
250 NaCl concentration changes [3]. Consistent with this hypothesis, NaCl downsteps trigger  
251 an influx of calcium into ASER which was blocked in animals lacking TAX-2 or TAX-4

252 [25]. Additionally, a study indicating that cGMP could be a putative second messenger in  
253 ASER revealed that loss of the rGC GCY-22 blunts chemotaxis to Cl<sup>-</sup> [4]. This suggests  
254 that cGMP levels could be modulated by changes in NaCl concentration [3].

255 To explore this hypothesis, we expressed WincG2 in the ASE neuron pair and  
256 monitored the sensor's response in the ASER cell body to ten 10-second steps between  
257 50 and 0 mM NaCl. WincG2 fluorescence decreased linearly ( $R^2 = 0.9962$ ) in response  
258 to a 50 to 0 mM NaCl downstep and stopped decreasing in response to the first 0 to 50  
259 mM NaCl upstep (Fig 3A: blue trace, bottom). The slopes between the first downstep and  
260 upstep are different ( $p < 0.00001$ ; see Materials and Methods for statistical analysis),  
261 suggesting that WincG2 responds quickly to changing NaCl concentrations (Fig 3B: first  
262 pair, blue).

263 To test whether changes in WincG2 fluorescence were due to changing NaCl  
264 concentrations or to the potential fluctuation in pressure due to the change in flow of the  
265 stimulus presentation stream, we examined the sensor's responses to ten 10-second  
266 switches of 50 mM NaCl. WincG2 fluorescence did not change in these animals in  
267 response to switching (Fig 3A: pink trace, top; Fig 3B: second pair, pink). Additionally, the  
268 slopes of the first downstep between animals recorded in response to changing NaCl  
269 concentration and animals recorded in response to simply switching the buffer stream are  
270 different ( $p < 0.00001$ ), suggesting that WincG2 fluorescence changes were due to NaCl  
271 concentration steps and not to fluctuations in fluid pressure on the exposed nose of the  
272 animal (Fig 3B).

273 WincG2 has a cGMP-binding motif that could also potentially accommodate cAMP,  
274 albeit with lower affinity [23,27]. To assess whether WincG2 fluorescence was dependent

275 on cGMP or cAMP, we recorded ASER WincG2 fluorescence in animals lacking the rGC  
276 GCY-22. Though other rGCs are expressed in ASER [3,16], loss of GCY-22 produces the  
277 most severe behavioral defects in Cl<sup>-</sup> and NaCl chemotaxis [3]. Consistent with these  
278 findings and in contrast to wild-type animals, WincG2 fluorescence did not change in *gcy-*  
279 *22(tm2364)* animals in response to NaCl downsteps or upsteps (Fig 3A: teal trace, ns;  
280 Fig 3B: third pair, teal). This finding indicates that changes in WincG2 fluorescence  
281 require GCY-22 and likely result from changes in cGMP rather than cAMP.

282 Wild-type WincG2 fluorescence also increased relative to switch control and *gcy-*  
283 *22* animals in response to the second, third and fourth 0 to 50 mM NaCl upstep (Fig 3C  
284 and S2 Fig) and was dependent on both an actual change in NaCl concentration (Fig 3C,  
285 compare blue trace with pink trace,  $p < 0.0001$ ) and the rGC GCY-22 (Fig 3C, compare  
286 blue trace with teal trace,  $p < 0.05$ ). Together, these results suggest that WincG2 can  
287 report rapidly changing increases and decreases in endogenous cGMP levels.

### 288 **Animals expressing WincG2 in ASER prefer higher NaCl concentrations relative to** 289 **animals that do not express the reporter**

290 *C. elegans* requires ASER activity to adjust their preferred NaCl concentration to  
291 the concentration at which they were last fed; if ASER is killed, the animal's movement is  
292 less directed in response to a linear NaCl gradient [26]. Plasticity requires NaCl sensation,  
293 which in turn requires cGMP signaling; thus it is not surprising that *gcy-22(tm2364)*  
294 animals which we showed to not respond to NaCl concentration changes (Fig 3) do not  
295 exhibit a preference for the concentration of NaCl at which they were cultivated [16]. To  
296 assess whether WincG2 expression affected an animal's ability to exhibit a preference for  
297 its cultivation NaCl concentration, the behavior of WincG2-expressing wild-type animals

298 were compared to their nontransgenic siblings that did not express the WincG2 array and  
299 wild-type animals. Animals were cultivated for approximately six hours in the presence of  
300 OP50 *E. coli* bacteria on an NGM plate containing 25 mM, 50 mM, or 100 mM NaCl, then  
301 placed onto a chemotaxis assay plate containing a NaCl gradient from approximately 40  
302 to 90 mM NaCl (Fig 4A, adapted from [16]). A chemotaxis index (CI) of 1 indicates the  
303 animals' preference for the higher NaCl concentration, and a CI of -1 indicates the  
304 animals' preference for the lower NaCl concentration. Wild-type and nontransgenic  
305 siblings behaved as previously described; animals that were cultivated at 25 mM, 50 mM,  
306 and 100 mM NaCl had a CI approaching -1, 0 and 0.75, respectively (Fig 4B: first and  
307 second set of three bars, respectively) [16]. The WincG2-expressing animals' NaCl  
308 concentration preference at each cultivation NaCl concentration was higher, though not  
309 significantly different from wild-type animals (Fig 4B: third set of three bars); however,  
310 their preference for a higher NaCl concentration was significantly different from their  
311 nontransgenic siblings when they were cultivated at 100mM NaCl ( $p < 0.05$ ). Additionally,  
312 the animals' preference for a higher NaCl concentration seemed different from their  
313 nontransgenic siblings when they were cultivated at 50mM, though this was not significant  
314 ( $p = 0.15$ ), presumably due to variability of the transgenic animals' chemotaxis to NaCl  
315 when cultivated at 50mM. Other lines injected at the same concentration exhibited NaCl  
316 seeking behavior that was significantly different from both wild-type animals and their  
317 nontransgenic siblings (S3 Fig). This may indicate that WincG2 expression lowers free  
318 cGMP levels and therefore interferes with an aspect of cGMP dynamics in ASER that is  
319 required for food to reset the animals' preference to their cultivation NaCl concentration.

320 WincG2 fluorescence was recorded for the line that exhibited behavior that was  
321 not significantly different from wild-type animals. Importantly, in these animals, WincG2  
322 fluorescence decreased linearly in response to a 50 to 0 mM NaCl downstep and stopped  
323 decreasing in response to a 0 to 50 mM NaCl upstep, with the slopes between the first  
324 downstep and upstep being different (Fig 4C: red trace, bottom; Fig 4D: second pair, red;  
325  $p < 0.00001$ ). This finding is similar to that observed with WincG2 injected at a lower  
326 concentration (Fig 4D: first pair, blue; note that these data points are reproduced from Fig  
327 3A: blue trace, bottom and Fig 3B: first pair, blue, respectively). The slopes of the first  
328 downstep of wild-type animals injected at a lower versus higher concentration are not  
329 different, indicating that the concentrations injected did not influence recordings (Fig 4D:  
330 compare first blue trace with third red trace;  $p$  ns). Thus, though WincG2 reliably reports  
331 the stimulus-induced changes in the gustatory sensory neuron ASER, its expression may  
332 subtly alter behavior and this must be controlled for by comparing behavior in transgenic  
333 lines to the non-transgenic siblings.

334

### 335 **WincG2 fluorescence increases in PHB chemosensory tail neurons in response to** 336 **SDS**

337 To examine the ability of WincG2 to report cGMP changes in a neuron with a  
338 different modality, we expressed WincG2 in the nociceptive PHB neurons, which had  
339 been predicted to use cGMP as a second messenger. The PHBs are a pair of bilaterally  
340 symmetric sensory neurons located in the lumbar ganglia that extend ciliated dendrites  
341 into the phasmid structures within the tail of *C. elegans*. PHB neurons are chemosensory  
342 cells that are required for the avoidance of noxious chemicals such as SDS, dodecanoic

343 acid and other cues (Fig 5A) [19,20,32,33]. TAX-4 is required for PHB-mediated SDS  
344 avoidance (Fig 5C), and calcium imaging has shown that PHB responds to SDS [20]. This  
345 suggests that PHB may exhibit changes in cGMP levels in response to SDS that could  
346 be monitored by recording changes in WincG2 fluorescence.

347 To test whether WincG2 affects the function of the PHB circuit, SDS response  
348 assays (Fig 5B) were performed on wild-type animals and animals expressing WincG2 in  
349 PHB neurons. On average, wild-type animals halt movement into a drop of 1 mM SDS in  
350 less than a second. If PHB function is impaired, as in *tax-4* mutants, animals continue  
351 moving into a drop of SDS as if it were a control buffer (M13). This increases the relative  
352 response index to approximately 300% (Fig 5C). We found that behavioral responses to  
353 SDS were unaffected by WincG2 expression, indicating that WincG2 does not affect PHB  
354 function (Fig 5C).

355 To determine if cGMP changes in PHB neurons could be detected using WincG2,  
356 the sensor's fluorescence in the cell body was measured in animals that were first  
357 exposed to control buffer (M13), then to 1 mM SDS in M13 buffer. WincG2 fluorescence  
358 remained largely steady in the absence of 1 mM SDS, but began to increase linearly  
359 ( $R^2=0.9633$ ) upon exposure to 1 mM SDS (Fig 5D). The area of the curve for the traces  
360 before and after SDS presentation is different (permutation test,  $p<0.00001$ ), which  
361 suggests that cGMP increases in response to SDS and that WincG2 responds acutely to  
362 endogenously produced cGMP that is induced by an external stimulus (Fig 5E).

363

## 364 Discussion

### 365 WincG2 is a sensor for cGMP dynamics in *C. elegans*



366           The cGMP sensor WincG2 was successfully used to monitor the dynamics of this  
367 second messenger in a number of cells in *C. elegans*. First, WincG2 was used to monitor  
368 the kinetics of cGMP production in body wall muscles that lack most endogenous GCs.  
369 The rate of increase in WincG2 fluorescence corresponded with the rate of cGMP  
370 produced by coexpressed blue light-activated GCs. WincG2 fluorescence increased  
371 within less than a second of activation of BeCyclOp, which produces 17 cGMP molecules  
372 per second. In contrast, WincG2 fluorescence increased in the order of minutes upon  
373 activation of bPGC, which produces cGMP at a 50-fold lower rate relative to BeCyclOp  
374 [24]. WincG2 fluorescence slightly increased in the presence of cAMP in *C. elegans* in  
375 response to activation of bPAC. Thus, care must be taken to control for fluctuations in  
376 cAMP by imaging in backgrounds that lack cGMP production. The high rate of cAMP  
377 production due to bPAC, however, is likely exceeding any intrinsic cAMP production by  
378 several fold, thus side effects from intrinsic cAMP fluctuation may affect cGMP imaging  
379 only to a minor extent.

380

381 **WincG2 reveals cGMP dynamics in sensory neurons that use cGMP as a second**  
382 **messenger for sensory stimuli**

383           We expressed WincG2 in sensory neurons that use cGMP as a second messenger  
384 and found that the sensor responds robustly to changing stimulus presentation. In the  
385 gustatory neuron ASER, changes in WincG2 fluorescence in response to repeated NaCl  
386 concentration steps suggest that the sensor can respond reliably to changing cGMP  
387 levels, providing, for the first time, visual evidence that cGMP levels in ASER are  
388 modulated by NaCl concentration changes. Importantly, we demonstrated that WincG2

389 fluorescence changes require the rGC GCY-22. This has two implications: 1) the sensor  
390 responds to cGMP in a physiologically relevant setting and 2) GCY-22 seems to be the  
391 primary rGC that produces cGMP for the NaCl response. Interestingly, the changes we  
392 observe in WincG2 fluorescence in ASER suggest that cGMP levels may be inversely  
393 correlated with calcium in response to a NaCl concentration change. Previously reported  
394 genetic and calcium imaging evidence suggested that cGMP levels would directly  
395 correlate with calcium levels; cGMP is hypothesized to bind and open the TAX-2/TAX-4  
396 cyclic nucleotide-gated cation channel to allow for calcium influx [25]. A recent cryo-EM  
397 study showed that cGMP gates the homomeric TAX-4 channel in the open state [34].  
398 Additionally, physiological investigations of the heterologously expressed heteromeric  
399 TAX-2/TAX-4 cation channel indicated that it opens in response to cGMP binding [35,36].  
400 The unexpected result that WincG2 fluorescence decreases in response to NaCl  
401 downsteps could be due to the tight regulation of cGMP levels by phosphodiesterases.  
402 Resolution of this apparent paradox, however, awaits further investigation.

403         In the nociceptive phasmid neuron PHB, genetic evidence suggesting that it uses  
404 cGMP to signal the presence of SDS was corroborated by changes in WincG2  
405 fluorescence. This is the first visual evidence for a cGMP-based signal in PHB, showing  
406 that it increases in response to an environmental cue. Importantly, expression of WincG2  
407 did not perturb the function of the phasmid neurons, as SDS repulsion was as robust in  
408 the WincG2-expressing line as in wild-type animals. This is in contrast to WincG2  
409 expression in ASER, which caused a slight preference for higher NaCl concentrations but  
410 minimally affected the plasticity of the NaCl concentration cultivation preference.

411

## 412 **Prospects for optimizing WincG2 and extending its use**

413 Like WincG2, the first generation of calcium sensors affected the behavior of  
414 neurons in which they were expressed: the FRET-based YC2.12 acted as a calcium  
415 sponge, a function that was exploited by Ferkey et al. to study nociceptive signaling [37],  
416 and the GFP-based GCaMP2.2 blocked olfactory plasticity (personal communication,  
417 Brueggemann and L'Etoile). Mutations that increased the quantal yield of GCaMP  
418 allowed the reporters to be expressed at lower levels that did not interfere with cellular  
419 function, yet were bright enough for imaging. Indeed, if WincG2 was enhanced to mimic  
420 the properties of GCaMP6s, which contains (among other mutations) a K78H mutation in  
421 the cpEGFP domain that improved sensitivity relative to GCaMP3, the fluorescence might  
422 be bright enough to allow for lower expression of this reporter and thus reduce the  
423 possibility of it interfering with cellular functions [38]. Until such optimizations are made,  
424 it will be necessary to select for lines that express WincG2 at the lowest levels that allow  
425 for imaging thereby minimizing the potential for behavioral effects. Addition of a  
426 subcellular localization signal may also mitigate off-target effects.

427 We think WincG2 could be acting as a cGMP sponge due to its effects on NaCl-  
428 seeking behavior when expressed in ASE (Fig 5B). These behavioral results suggest that  
429 WincG2 could be altering free cGMP levels in ASER, which could lead to tuning the NaCl  
430 concentration cultivation preference to be higher relative to nontransgenic siblings and  
431 wild-type animals. If WincG2 can be shown to act as a cGMP sponge, this could also be  
432 exploited to specifically and locally perturb cGMP levels. For example, if one could  
433 localize a non-fluorescent form of WincG2 at the cilia, this may perturb function in a

434 different way from when it is localized to the cell body. This would reveal specific functions  
435 for cGMP signals at the sensory dendrites that are different from those in the cell body.

436         Additionally, the subcellular landscape of cGMP can also be probed using WincG2.  
437 For instance, adding a small tag that localizes WincG2 to specific regions of the cell along  
438 with a red protein for ratiometric imaging may reveal important aspects of the subcellular  
439 landscape of cGMP.

440         Though FRET-based cGMP sensors have been useful for uncovering cGMP  
441 dynamics in biological processes in an intact animal [8,22], the single fluorophore WincG2  
442 provides the possibility of using additional fluorophores of different wavelengths to mark  
443 subcellular regions. This advantage of WincG2 will provide a simple and powerful tool  
444 with which to visualize changes in cGMP concentration across the subcellular landscape.  
445 Additionally, the ability to simultaneously visualize cGMP and calcium by using WincG2  
446 with a red calcium sensor will allow us to investigate the dynamics of these second  
447 messengers at any marked subcellular location [39]. Our results demonstrate that  
448 WincG2 can be used to rapidly and specifically measure cGMP dynamics in the intact,  
449 behaving organism.

450

## 451 **Materials and Methods**

### 452 **Molecular Biology**

453         FlinG3 was codon optimized by Genscript for use in *C. elegans*. The *C. elegans*  
454 codon-optimized FlincG3, WincG2, was inserted into a worm specific expression (Fire)  
455 vector, pPD95.75, which facilitates transcription and translation of the sensor by providing  
456 worm specific introns [40].

457 The *gcy-5* promoter (2003 bp upstream of start site) was inserted using XbaI and  
458 EagI into pPD95.75 to make *gcy-5p::WincG2*. *myo-3p::CyclOp::SL2::mCherry* was made  
459 as described [24]. The plasmid *gcy-5p::WincG2* was digested with XbaI and PciI and the  
460 *gcy-5* promoter fragment was replaced with the *myo-3* promoter fragment to yield the  
461 *myo-3p::WincG2* plasmid construct.

462 pCFJ104 [*myo-3p::mCherry::unc-54*] was a gift from Erik Jorgensen (Addgene  
463 plasmid # 19328) [41]. To generate *myo-3p::bPAC::SL2::mCherry*, a 1193 bp long bPAC  
464 fragment was amplified using primers 5'-  
465 TCCATCTAGAGGATCCTTCCGCATCTCTTGTTCAAGGG-3' and 5'-  
466 CAGCGGTACCGTCTGACTTACTTGTCGTTTTCCAGGGTCTG-3'. This was ligated into  
467 *myo-3p::SL2::mCherry* backbone, obtained by digestion with BamHI and Sall, using 'in-  
468 fusion cloning' (Clontech). To generate *myo-3p::bPGC::SL2::mCherry*, a 3486 bp long  
469 *myo-3p::bPGC* fragment was amplified using primers 5'-  
470 ATTACGCCAAGCTTGCGGCTATAATAAGTTCTTGAA-3' and 5'-  
471 TACCGTCGACGCTAGTTACTTGTCGTTTTCCAGGG-3'. This was ligated into a  
472 *SL2::mCherry* backbone, obtained by digestion with NheI and SphI, using 'in-fusion  
473 cloning' (Clontech).

474 To generate the *nlp-1p::WincG2* construct, *WincG2* from *gcy-5p::WincG2* was  
475 inserted into the vector *nlp-1p::pSMΔ* [42] using the NEBuilder High-Fidelity DNA  
476 Assembly Cloning Kit (NEB) and the following primers: MVP598 *WincG* FWD (5'-  
477 ggattggccaaaggacATGGCACACCACCACCAC-3'), MPV599 *WincG* REV (5'-  
478 ggtcctcctgaaaatgttcTTATCGTCCGAATCCTCCG-3'), MVP597 *pSMΔ::nlp-1p* FWD (5'-

479 GAACATTTTCAGGAGGACCC-3'), and MVP596 *nlp-1p::pSMΔ* REV (5'-  
480 GTCCTTTGGCCAATCCCG-3'). The construct was then sequence-verified.

481 To generate the *flp-6p::WincG2* construct, the *flp-6* promoter fragment was  
482 amplified from *flp-6p::GCaMP6*, a gift from the Lockery lab, using the primers 5'-  
483 ATTACGCCAAGCTTGCATGGCAGCGCTTGACTTCTGATG-3' and 5'-  
484 CCGGGGATCCTCTAGTGCAGGCATGCAAGCTTGTC-3'. The plasmid *nlp-1p::WincG2*  
485 was digested with XbaI and SphI-HF and the *nlp-1* promoter fragment was replaced with  
486 the *flp-6* promoter fragment to yield the *flp-6p::WincG2* plasmid construct using 'in-fusion'  
487 cloning (Clontech). The plasmid *str-2::jRCaMP1b*, a gift from the Bargmann lab, was  
488 digested with HindIII-HF and XmaI and *str-2* was replaced with the *flp-6* promoter  
489 fragment to yield the *flp-6p::jRCaMP1b* plasmid construct using 'in-fusion' cloning  
490 (Clontech). The plasmid *str-2p::jRGECO1a*, a gift from the Bargmann lab, was digested  
491 with HindIII-HF and AscI and the *str-2* promoter fragment was replaced with the *flp-6*  
492 promoter fragment to yield the *flp-6p::jRGECO1a* plasmid construct using 'in-fusion'  
493 cloning (Clontech).

494 pJN55 [*myo-3p::tax-2::GFP*] and pJN58 [*myo-3p::tax-4::GFP*] plasmid  
495 construction have been previously reported [24]. pWSC13 [*myo-3p::bPGC::eYFP*]:  
496 pPD96.52 was cut with NheI and BamHI to yield a 6010 bp fragment, and bPGC synthetic  
497 construct, a gift from Peter Hegemann, was cut with BamHI and NheI to yield a 2106 bp  
498 fragment that was then inserted into cut pPD96.52. pJN59 [*myo-*  
499 *3p::bPGC(K265D)::eYFP*] : K265D was introduced into the parent plasmid pWSC13  
500 (*myo-3p::bPGC::eYFP*) using the Q5 site-directed mutagenesis kit (New England Biolabs

501 Inc.) and primers oJN146 (5'-CCTGAAGATGGACCACGGCCTGC-3') and oJN147 (5'-  
502 CTGCTGCCCCATGTTGCCC-3').

503

504

505

## 506 **Transgenic Strains**

507 Transgenic *C. elegans* were obtained by microinjection of DNA into the gonads of  
508 nematodes by standard procedures [43]. ZX1921 (*zxEx895[myo-3p::CyclOp::SL2::mCherry, myo-3p::WincG2]*): 15ng/μl *myo-3p::CyclOp::SL2::mCherry*  
509 and 15ng/μl *myo-3p::WincG2* were microinjected into N2 background worms. ZX1757  
510 (*zxEx893[myo-3p::mCherry, myo-3p::WincG2]*): 5 ng/μl *myo-3p::mCherry* and 20 ng/μl  
511 *myo-3p::WincG2* were microinjected into N2 background worms. ZX1922 (*zxEx896[myo-3p::bPAC::SL2::mCherry, pmyo-3p::WincG2]*): 15ng/μl *myo-3p::bPAC::SL2::mCherry* and  
512 15ng/μl *myo-3p::WincG2* were microinjected into N2 background worms. ZX1756  
513 (*zxEx892[myo-3p::bPGC::SL2::mCherry, myo-3p::WincG2]*): 15ng/μl *myo-3p::bPGC::SL2::mCherry* and 15ng/μl *myo-3p::WincG2* were microinjected into N2  
514 background worms. JZ1997 (*ASE WincG2 in N2 injected with 15ng/μl WincG2*): 15ng/μl  
515 *flp-6p::WincG2*, 30 ng/μl *flp-6p::jRCaMP1b* and 20ng/μl *ofm-1::GFP* were microinjected  
516 into N2 background worms. JZ2089 (*ASE WincG2 in N2 injected with 7.5 ng/μl WincG2*):  
517 7.5ng/μl *flp-6p::WincG2*, 60 ng/μl *flp-6p::jRGECO1a* and 20ng/μl *ofm-1::GFP* were  
518 microinjected into N2 background worms. JZ2118 (*ASE WincG2 in gcy-22*): JZ2089  
519 animals were crossed with OH4839 (*gcy-22(tm2364)*) animals to generate transgenic  
520 animals homozygous for *gcy-22(tm2364)*. PHB *WincG2 in N2*: MKV937 (*iyEx222*

524 [15ng/μL *nlp-1p::WincG2* and 45ng/μl *odr-1p::RFP* in N2 background worms]). *ZX1738*  
525 (*zxEx886[myo-3p::bPGC::YFP, myo-3p::tax-2::GFP, myo-3p::tax-4::GFP]*): 15ng/μl *myo-*  
526 *3p::bPGC::YFP*, 5 ng/μl *myo-3p::tax-2::GFP* and 5 ng/μl *myo-3p::tax-4::GFP* were injected  
527 into *lite-1(ce314)* background worms.  
528 *ZX1739 (zxEx887[myo-3p::bPGC(K265D)::YFP, myo-3p::tax-2::GFP, pmyo-3::tax-4::GFP])*:  
529 15ng/μl *myo-3p::bPGC(K265D)::YFP*, 5 ng/μl *myo-3p::tax-2::GFP* and 5 ng/μl *myo-3p::tax-*  
530 *4::GFP* were injected into *lite-1(ce314)* background worms.  
531

### 532 **Imaging WincG2 coexpressed with BeCyclOp, bPGC or bPAC**

533 Transgenic strains were kept in the dark on standard NGM plates (5.5 cm  
534 diameter; 8ml NGM) with OP50-1 bacteria with or without ATR at 20°C. Plates containing  
535 ATR were prepared by spreading 200 μl of OP50-1 culture containing 100 mM of ATR  
536 (diluted in ethanol). L4 animals were put on ATR plates overnight and young adults were  
537 used for imaging the following day.

538 For cGMP/cAMP imaging, animals were immobilized on 10% M9 agar pads with  
539 polystyrene beads (Polysciences, USA). The fluorescence measurements were  
540 performed with a 25x oil objective (Zeiss 25x LCI-Plan / 0.8 Imm Corr DIC) on the inverted  
541 microscope Axio Observer Z.1 equipped with two high-power light emitting diodes (LEDs;  
542 470 and 590 nm wavelength, KSL 70, Rapp Optoelektronik, Germany) coupled via a  
543 beam splitter and a double band pass excitation filter permitting wavelengths of  
544 479/21 nm and 585/19 (F74-423 479/585 HC Dualband Filter AHF Analysentechnik) to  
545 obtain simultaneous dual-wavelength illumination. DIC microscopy using white light  
546 filtered with a red optical filter was used to focus on the body wall muscle cells prior to



547 video acquisition. The 470nm and 590 nm excitation was switched on simultaneously  
548 after the start of video acquisition. For bPGC experiments, yellow light was used to focus  
549 the cells, and thereafter the blue illumination was turned on. Fluorescence was acquired  
550 by an ORCA-Flash 4.0 sCMOS camera (Hamamatsu) through a Dual-View beam splitter  
551 (DV2, Photometrics) with a 540/25 nm emission filter used for WincG2 green channel and  
552 a 647/57 emission filter for mCherry red channel. Videos were acquired using  $\mu$ Manager  
553 [44], and frames were taken at 100Hz (corresponding to exposure times of 10 ms) and  
554 20Hz (for bPGC) with 4x4 spatial binning. The optical power was 3.3 mW/mm<sup>2</sup> at 470 nm  
555 and 2.6 mW/mm<sup>2</sup> at 590 nm.

556 Image analysis was performed in ImageJ (NIH). Regions of interest (ROIs) were drawn  
557 around single body wall muscle cells that did not show major movement and a region  
558 outside the animals was chosen as background ROI. The mean fluorescence intensity of  
559 the ROIs for both channels was analyzed with ImageJ. Background subtracted values  
560 were used to calculate the change in fluorescence intensity for each time point:  $(F-F_0)/F_0$   
561 where F represents the intensity at this time point and  $F_0$  represents the peak intensity at  
562 the onset of light stimulation. For bPGC experiments,  $F_0$  represents the intensity 5s after  
563 the onset of light stimulation.

564

### 565 **Imaging WincG2 in ASER and PHB**

566 WincG2 imaging was performed essentially as described for calcium imaging [17].  
567 Briefly, for imaging ASER, day 1 adults grown at 20°C were transferred from NGM plates  
568 containing OP50 to a 35 mm x 10 mm petri dish containing chemotaxis buffer with 50 mM  
569 NaCl (25 mM K<sub>3</sub>PO<sub>4</sub>, pH 6.0, 1 mM CaCl<sub>2</sub>, 1 mM MgSO<sub>4</sub>, 50 mM NaCl, adjusted to 355

570  $\pm 2$  mOsm with sorbitol). The worms were then placed in a microfluidic device that can  
571 expose the animal to stimulus [45]. A Zeiss 40x air objective on an inverted microscope  
572 (Zeiss Axiovert 200) was used for imaging, and images were taken at rate of 1Hz with a  
573 blue light exposure time of 30 ms using an ORCA-Flash 2.8 camera (Hamamatsu) for a  
574 total of 103 frames. Recordings were taken within eight minutes of the animal's exposure  
575 to chemotaxis buffer with 50 mM NaCl, and the animals were subjected to either ten  
576 second steps between chemotaxis buffer with 50 and 0 mM NaCl (each containing 1 mM  
577 levamisole) or switches between chemotaxis buffer with 50 mM NaCl (each containing 1  
578 mM levamisole (Sigma-Aldrich), and one containing fluorescein). Images were obtained  
579 using  $\mu$ Manager (Version 1.4.22). Fluorescence intensity was measured using ImageJ.  
580 To calculate the fluorescence intensity at a given time point (F), the fluorescence intensity  
581 from the region of interest (ROI) encompassing the neuron was subtracted from the  
582 background ROI. The fluorescence intensity F of the first three frames was averaged to  
583 calculate  $F_0$ . We used  $\Delta F/F_0$  ( $F-F_0/F_0$ ) to calculate the change in fluorescence intensity  
584 at a given time point.

585 To image WincG2 in PHB neurons, animals were picked from NGM plates  
586 containing OP50 onto a petri dish containing M13 control buffer, then placed tail-first into  
587 the microfluidic device. They were exposed to control buffer for 15 seconds, and then to  
588 1 mM SDS in M13 for 15 seconds. They were imaged at a rate of 2 Hz. To calculate the  
589 fluorescence intensity of PHB at each frame, Image J was used to measure the total intensity  
590 of the cell body. Background fluorescence was calculated by using ImageJ to measure the  
591 minimum pixel value in the area surrounding the cell body, and this pixel value was multiplied  
592 by the area of the cell body to get the total background. The total background was subtracted

593 from the total intensity of the cell body to calculate the fluorescence intensity. The PHB  
594 WincG2 fluorescence intensities were adjusted for photobleaching using the following  
595 method. The decrease in fluorescence during the first 29 frames when the animal was  
596 exposed to control buffer was presumed to be due to photobleaching. Therefore, the average  
597 difference between the values for the nth frame and the n+1th frame (up to the 29<sup>th</sup> frame)  
598 were calculated, and this average photobleaching value was then added back to each value  
599 in the series.  $F_0$  was the average of the response to buffer adjusted for photobleaching  
600 over the first 15 seconds, rather than only the first 3 data points.

601

## 602 **NaCl cultivation assay**

603 The NaCl cultivation assay was essentially performed as described [16]. Briefly,  
604 day 1 animals grown at 20°C were transferred from OP50-containing NGM plates  
605 containing 50 mM NaCl to OP50-containing NGM plates containing 25 mM, 50 mM, or  
606 100 mM NaCl for approximately six hours before being placed on a chemotaxis assay  
607 plate containing regions of higher and lower NaCl for 45 minutes. Afterward, worms were  
608 stored in 4°C for at least 16 hours before calculating the chemotaxis index. Chemotaxis  
609 index = [# animals at higher NaCl region – # animals at lower NaCl region]/ [# animals at  
610 higher NaCl region + # animals at lower NaCl region + # animals outside origin].

611

## 612 **Behavioral assay response to the repellent SDS**

613 SDS dry drop behavioral assays were conducted by using a hair pick to touch each  
614 worm on the nose to stimulate backward movement into a dry drop of 1 mM SDS in M13  
615 buffer [32,33]. A dry drop is obtained by incubating an NGM plate overnight at 37°C so

616 that the SDS drop dries quickly into the plate, preventing wicking along the animal that  
617 might activate neurons in the head. An animal's response time was defined as the amount  
618 of time it backed into the dry drop before terminating backward movement. The average  
619 response time to the dry drop of dilute SDS in M13 buffer was compared to the average  
620 response time to a drop of control M13 buffer. A response index was calculated by  
621 dividing the average response time to SDS by the average response time to M13 buffer.  
622 *nlp-1p::WincG2* and *tax-4* mutants were each compared to wild-type animals assayed on  
623 the same day, and the wild-type response index is normalized to 100%. At least 80  
624 animals of each genotype were tested: 40 for a response to M13, and 40 for a response  
625 to SDS.

626

### 627 **Muscle Contraction Assay**

628 The muscle contraction assay was essentially performed as described [24]. L4  
629 animals were exposed to 0.9 mW/mm<sup>2</sup> blue light (450-490 nm) for approximately 20  
630 seconds, and relative body length was measured with a custom LabView script.

631

### 632 **Statistical Analysis for ASER and PHB WincG2**

633 To compare the sum of slope values of the first 50 to 0 mM NaCl downstep with  
634 the first 0 to 50 mM NaCl upstep, as well as the sum of slope values of the first 50 to 0  
635 mM NaCl downstep and the second, third, and fourth 0 to 50 mM NaCl upstep, an  
636 approximate p-value ranked permutation test was performed on the data. To compare the  
637 sum of slope values of the first 50 to 0 mM NaCl downstep with the first 0 to 50 mM NaCl  
638 upstep, the sum of slopes for randomly rearranged data is calculated and ranked relative

639 to the sum of slopes for the first 50 to 0 mM NaCl downstep. For example, to compare  
640 the sum of slope values of the first 50 to 0 mM NaCl downstep with the first 0 to 50 mM  
641 NaCl upstep for wild-type animals, the 34 slope values of the first downstep and upstep  
642 were combined in a list then randomly rearranged, and the sum of the first 17 slope values  
643 of that randomly rearranged list was calculated and ranked relative to the sum of 17 slope  
644 values for the first 50 to 0 mM NaCl downstep. To compare the sum of slope values of  
645 the first 50 to 0 mM NaCl downstep between conditions, the sum of slopes for the  
646 randomly rearranged data is calculated and ranked relative to the sum of slopes for wild-  
647 type. For example, for comparing the sum of slope values of the first 50 to 0 mM NaCl  
648 downstep between wild-type and *gcy-22* animals, the 40 (n=17 for wild-type and n=23 for  
649 *gcy-22*) slope values were combined in a list then randomly rearranged, and the sum of  
650 the first 17 slope values of that randomly rearranged list was calculated and ranked  
651 relative to the sum of 17 slope values for wild-type. This type of statistical test was also  
652 performed for comparing the second, third, and fourth 0 to 50 mM NaCl upstep between  
653 conditions. The sum of slopes from at least 500,000 randomly selected permutations were  
654 calculated and ranked using a custom Python script. For comparing the sum of slope  
655 values of the first 50 to 0 mM NaCl downstep with the first 0 to 50 mM NaCl upstep for  
656 wild-type switch control; for comparing the sum of slope values for the first 50 to 0 mM  
657 NaCl downstep between wild-type and wild-type switch control; and for comparing the  
658 area under the curve for the first 30 frames of PHB WincG2 (corresponding to M13 buffer)  
659 with the next 30 frames of PHB WincG2 (corresponding to 1 mM SDS), an exact p-value  
660 ranked permutation test was performed. For this test, the sum of slopes for all possible  
661 permutations of the data was calculated and ranked using a custom Python script.

662

663

664 **Author contributions**

665 KA, WSC, MF, SW and MWS prepared reagents. JL, JN, BB-R, MWS, RS, AT and AV  
666 performed experiments. SW guided the project and performed experiments. OSH initiated  
667 the line of experimentation. AG, NDL and MV conceived the experiments and guided the  
668 project. DMF and CB helped guide the project. AG, NDL, JN, MV and SRW wrote the  
669 manuscript.

670

671 **Acknowledgements:** The authors would like to thank Martina Bremer and Saul Kato for  
672 statistical consults, as well as Cornelia Bargmann, Peter Hegemann, Erik Jorgensen and  
673 Shawn Lockery for reagents. The authors would also like to thank Sarah Nordquist and  
674 Piali Sengupta for guidance on writing the manuscript. NDL and MKV were supported by  
675 NIDCD R01 DC005991 and NINDS R01 NS087544-01; NDL and DMF by NIDCD R01  
676 DC015758; AG by DFG (Deutsche Forschungsgemeinschaft) grants GO1011/4-2,  
677 GO1011/13-1 and EXC115; SW by Diversity Supplement NS87544 and 5T32DE007306-  
678 21.

679

680 **References**

681 1. Potter LR. Guanylyl cyclase structure, function and regulation. *Cell Signal*. 2011;23:  
682 1921–1926. doi:10.1016/j.cellsig.2011.09.001

- 683 2. Yu S, Avery L, Baude E, Garbers DL. Guanylyl cyclase expression in specific  
684 sensory neurons: a new family of chemosensory receptors. Proc Natl Acad Sci U S  
685 A. 1997;94: 3384–3387.
- 686 3. Ortiz CO, Faumont S, Takayama J, Ahmed HK, Goldsmith AD, Pocock R, et al.  
687 Lateralized gustatory behavior of *C. elegans* is controlled by specific receptor-type  
688 guanylyl cyclases. Curr Biol CB. 2009;19: 996–1004. doi:10.1016/j.cub.2009.05.043
- 689 4. Smith HK, Luo L, O’Halloran D, Guo D, Huang X-Y, Samuel ADT, et al. Defining  
690 specificity determinants of cGMP mediated gustatory sensory transduction in  
691 *Caenorhabditis elegans*. Genetics. 2013;194: 885–901.  
692 doi:10.1534/genetics.113.152660
- 693 5. Singhvi A, Liu B, Friedman CJ, Fong J, Lu Y, Huang X-Y, et al. A Glial K/Cl  
694 Transporter Controls Neuronal Receptive Ending Shape by Chloride Inhibition of an  
695 rGC. Cell. 2016;165: 936–948. doi:10.1016/j.cell.2016.03.026
- 696 6. Hallem EA, Spencer WC, McWhirter RD, Zeller G, Henz SR, Rättsch G, et al.  
697 Receptor-type guanylate cyclase is required for carbon dioxide sensation by  
698 *Caenorhabditis elegans*. Proc Natl Acad Sci U S A. 2011;108: 254–259.  
699 doi:10.1073/pnas.1017354108
- 700 7. Lucas KA, Pitari GM, Kazerounian S, Ruiz-Stewart I, Park J, Schulz S, et al. Guanylyl  
701 cyclases and signaling by cyclic GMP. Pharmacol Rev. 2000;52: 375–414.

- 702 8. Couto A, Oda S, Nikolaev VO, Soltesz Z, de Bono M. In vivo genetic dissection of  
703 O<sub>2</sub>-evoked cGMP dynamics in a *Caenorhabditis elegans* gas sensor. Proc Natl Acad  
704 Sci U S A. 2013;110: E3301-3310. doi:10.1073/pnas.1217428110
- 705 9. Conti M, Beavo J. Biochemistry and physiology of cyclic nucleotide  
706 phosphodiesterases: essential components in cyclic nucleotide signaling. Annu Rev  
707 Biochem. 2007;76: 481–511. doi:10.1146/annurev.biochem.76.060305.150444
- 708 10. Francis SH, Blount MA, Corbin JD. Mammalian cyclic nucleotide  
709 phosphodiesterases: molecular mechanisms and physiological functions. Physiol  
710 Rev. 2011;91: 651–690. doi:10.1152/physrev.00030.2010
- 711 11. Ahmad F, Murata T, Shimizu K, Degerman E, Maurice D, Manganiello V. Cyclic  
712 nucleotide phosphodiesterases: important signaling modulators and therapeutic  
713 targets. Oral Dis. 2015;21: e25-50. doi:10.1111/odi.12275
- 714 12. Lee JI, O'Halloran DM, Eastham-Anderson J, Juang B-T, Kaye JA, Scott Hamilton  
715 O, et al. Nuclear entry of a cGMP-dependent kinase converts transient into long-  
716 lasting olfactory adaptation. Proc Natl Acad Sci U S A. 2010;107: 6016–6021.  
717 doi:10.1073/pnas.1000866107
- 718 13. Juang B-T, Gu C, Starnes L, Palladino F, Goga A, Kennedy S, et al. Endogenous  
719 nuclear RNAi mediates behavioral adaptation to odor. Cell. 2013;154: 1010–1022.  
720 doi:10.1016/j.cell.2013.08.006



- 721 14. Gross OP, Pugh EN, Burns ME. cGMP in mouse rods: the spatiotemporal dynamics  
722 underlying single photon responses. *Front Mol Neurosci.* 2015;8: 6.  
723 doi:10.3389/fnmol.2015.00006
- 724 15. Mukhopadhyay S, Lu Y, Shaham S, Sengupta P. Sensory signaling-dependent  
725 remodeling of olfactory cilia architecture in *C. elegans*. *Dev Cell.* 2008;14: 762–774.  
726 doi:10.1016/j.devcel.2008.03.002
- 727 16. Kunitomo H, Sato H, Iwata R, Satoh Y, Ohno H, Yamada K, et al. Concentration  
728 memory-dependent synaptic plasticity of a taste circuit regulates salt concentration  
729 chemotaxis in *Caenorhabditis elegans*. *Nat Commun.* 2013;4: 2210.  
730 doi:10.1038/ncomms3210
- 731 17. Krzyzanowski MC, Brueggemann C, Ezak MJ, Wood JF, Michaels KL, Jackson CA,  
732 et al. The *C. elegans* cGMP-dependent protein kinase EGL-4 regulates nociceptive  
733 behavioral sensitivity. *PLoS Genet.* 2013;9: e1003619.  
734 doi:10.1371/journal.pgen.1003619
- 735 18. Krzyzanowski MC, Woldemariam S, Wood JF, Chaubey AH, Brueggemann C,  
736 Bowitch A, et al. Aversive Behavior in the Nematode *C. elegans* Is Modulated by  
737 cGMP and a Neuronal Gap Junction Network. *PLoS Genet.* 2016;12: e1006153.  
738 doi:10.1371/journal.pgen.1006153
- 739 19. Tran A, Tang A, O’Loughlin CT, Balistreri A, Chang E, Coto Villa D, et al. *C. elegans*  
740 avoids toxin-producing *Streptomyces* using a seven transmembrane domain  
741 chemosensory receptor. *eLife.* 2017;6. doi:10.7554/eLife.23770

- 742 20. Zou W, Cheng H, Li S, Yue X, Xue Y, Chen S, et al. Polymodal Responses in *C.*  
743 *elegans* Phasmid Neurons Rely on Multiple Intracellular and Intercellular Signaling  
744 Pathways. *Sci Rep.* 2017;7: 42295. doi:10.1038/srep42295
- 745 21. O'Halloran DM, Hamilton OS, Lee JI, Gallegos M, L'Etoile ND. Changes in cGMP  
746 levels affect the localization of EGL-4 in AWC in *Caenorhabditis elegans*. *PLoS One.*  
747 2012;7: e31614. doi:10.1371/journal.pone.0031614
- 748 22. Shidara H, Hotta K, Oka K. Compartmentalized cGMP Responses of Olfactory  
749 Sensory Neurons in *Caenorhabditis elegans*. *J Neurosci Off J Soc Neurosci.*  
750 2017;37: 3753–3763. doi:10.1523/JNEUROSCI.2628-16.2017
- 751 23. Bhargava Y, Hampden-Smith K, Chachlaki K, Wood KC, Vernon J, Allerston CK, et  
752 al. Improved genetically-encoded, FlincG-type fluorescent biosensors for neural  
753 cGMP imaging. *Front Mol Neurosci.* 2013;6: 26. doi:10.3389/fnmol.2013.00026
- 754 24. Gao S, Nagpal J, Schneider MW, Kozjak-Pavlovic V, Nagel G, Gottschalk A.  
755 Optogenetic manipulation of cGMP in cells and animals by the tightly light-regulated  
756 guanylyl-cyclase opsin CyclOp. *Nat Commun.* 2015;6: 8046.  
757 doi:10.1038/ncomms9046
- 758 25. Suzuki H, Thiele TR, Faumont S, Ezcurra M, Lockery SR, Schafer WR. Functional  
759 asymmetry in *Caenorhabditis elegans* taste neurons and its computational role in  
760 chemotaxis. *Nature.* 2008;454: 114–117. doi:10.1038/nature06927

- 761 26. Luo L, Wen Q, Ren J, Hendricks M, Gershow M, Qin Y, et al. Dynamic encoding of  
762 perception, memory, and movement in a *C. elegans* chemotaxis circuit. *Neuron*.  
763 2014;82: 1115–1128. doi:10.1016/j.neuron.2014.05.010
- 764 27. Nausch LWM, Ledoux J, Bonev AD, Nelson MT, Dostmann WR. Differential  
765 patterning of cGMP in vascular smooth muscle cells revealed by single GFP-linked  
766 biosensors. *Proc Natl Acad Sci U S A*. 2008;105: 365–370.  
767 doi:10.1073/pnas.0710387105
- 768 28. Ryu M-H, Moskvina OV, Siltberg-Liberles J, Gomelsky M. Natural and engineered  
769 photoactivated nucleotidyl cyclases for optogenetic applications. *J Biol Chem*.  
770 2010;285: 41501–41508. doi:10.1074/jbc.M110.177600
- 771 29. Shaner NC, Lin MZ, McKeown MR, Steinbach PA, Hazelwood KL, Davidson MW, et  
772 al. Improving the photostability of bright monomeric orange and red fluorescent  
773 proteins. *Nat Methods*. 2008;5: 545–551. doi:10.1038/nmeth.1209
- 774 30. Akerboom J, Carreras Calderón N, Tian L, Wabnig S, Prigge M, Tolö J, et al.  
775 Genetically encoded calcium indicators for multi-color neural activity imaging and  
776 combination with optogenetics. *Front Mol Neurosci*. 2013;6: 2.  
777 doi:10.3389/fnmol.2013.00002
- 778 31. Stierl M, Stumpf P, Udvari D, Gueta R, Hagedorn R, Losi A, et al. Light modulation  
779 of cellular cAMP by a small bacterial photoactivated adenylyl cyclase, bPAC, of the  
780 soil bacterium *Beggiatoa*. *J Biol Chem*. 2011;286: 1181–1188.  
781 doi:10.1074/jbc.M110.185496

- 782 32. Hilliard MA, Bargmann CI, Bazzicalupo P. *C. elegans* responds to chemical  
783 repellents by integrating sensory inputs from the head and the tail. *Curr Biol* CB.  
784 2002;12: 730–734.
- 785 33. Park J, Knezevich PL, Wung W, O'Hanlon SN, Goyal A, Benedetti KL, et al. A  
786 conserved juxtacrine signal regulates synaptic partner recognition in *Caenorhabditis*  
787 *elegans*. *Neural Develop*. 2011;6: 28. doi:10.1186/1749-8104-6-28
- 788 34. Li M, Zhou X, Wang S, Michailidis I, Gong Y, Su D, et al. Structure of a eukaryotic  
789 cyclic-nucleotide-gated channel. *Nature*. 2017;542: 60–65.  
790 doi:10.1038/nature20819
- 791 35. Komatsu H, Jin YH, L'Etoile N, Mori I, Bargmann CI, Akaike N, et al. Functional  
792 reconstitution of a heteromeric cyclic nucleotide-gated channel of *Caenorhabditis*  
793 *elegans* in cultured cells. *Brain Res*. 1999;821: 160–168.
- 794 36. O'Halloran DM, Altshuler-Keylin S, Zhang X-D, He C, Morales-Phan C, Yu Y, et al.  
795 Contribution of the cyclic nucleotide gated channel subunit, CNG-3, to olfactory  
796 plasticity in *Caenorhabditis elegans*. *Sci Rep*. 2017;7: 169. doi:10.1038/s41598-017-  
797 00126-7
- 798 37. Ferkey DM, Hyde R, Haspel G, Dionne HM, Hess HA, Suzuki H, et al. *C. elegans* G  
799 protein regulator RGS-3 controls sensitivity to sensory stimuli. *Neuron*. 2007;53: 39–  
800 52. doi:10.1016/j.neuron.2006.11.015

- 801 38. Chen T-W, Wardill TJ, Sun Y, Pulver SR, Renninger SL, Baohan A, et al.  
802 Ultrasensitive fluorescent proteins for imaging neuronal activity. *Nature*. 2013;499:  
803 295–300. doi:10.1038/nature12354
- 804 39. Dana H, Mohar B, Sun Y, Narayan S, Gordus A, Hasseman JP, et al. Sensitive red  
805 protein calcium indicators for imaging neural activity. *eLife*. 2016;5.  
806 doi:10.7554/eLife.12727
- 807 40. Evans T, editor. Transformation and microinjection. *WormBook: The Online Review*  
808 *of C elegans Biology* [Internet]. 2006.
- 809 41. Frøkjær-Jensen C, Wayne Davis M, Hopkins CE, Newman BJ, Thummel JM, Olesen  
810 S-P, et al. Single-copy insertion of transgenes in *Caenorhabditis elegans*. *Nat Genet*.  
811 2008;40: 1375–1383. doi:10.1038/ng.248
- 812 42. Barsi-Rhyne BJ, Miller KM, Vargas CT, Thomas AB, Park J, Bremer M, et al. Kinesin-  
813 1 acts with netrin and DCC to maintain sensory neuron position in *Caenorhabditis*  
814 *elegans*. *Genetics*. 2013;194: 175–187. doi:10.1534/genetics.113.149310
- 815 43. Fire A. Integrative transformation of *Caenorhabditis elegans*. *EMBO J*. 1986;5:  
816 2673–2680.
- 817 44. Edelstein A, Amodaj N, Hoover K, Vale R, Stuurman N. Computer control of  
818 microscopes using  $\mu$ Manager. *Curr Protoc Mol Biol* Ed Frederick M Ausubel Al.  
819 2010;Chapter 14: Unit14.20. doi:10.1002/0471142727.mb1420s92

820 45. Chronis N, Zimmer M, Bargmann CI. Microfluidics for in vivo imaging of neuronal and  
821 behavioral activity in *Caenorhabditis elegans*. Nat Methods. 2007;4: 727–731.  
822 doi:10.1038/nmeth1075

823

## 824 **Figure Captions**

825 **Fig 1. WincG2 is a GFP-based cGMP sensor codon optimized for use in *C.***

826 ***elegans*.**

827 WincG2 is the *C. elegans* codon-optimized version of the mammalian cGMP sensor  
828 FlincG3 (figured adapted from Garthwaite) [23]. This GFP-based sensor contains two in-  
829 tandem protein kinase G (PKG) I  $\alpha$  cGMP binding domains that bind cGMP cooperatively  
830 (PKG1 $\alpha$  (77-356); maroon); this regulatory PKG domain is attached to the N terminus of  
831 circularly permuted EGFP (cpEGFP; green). Changing the methionine at position 335,  
832 located outside the beta barrel of the cpEGFP domain, to lysine (M335K), improved the  
833 response amplitude of the sensor to cGMP [23]. GGTGGS is a linker between the two  
834 GFP halves. This linker, along with the 6xHis-tag region (H6) and the Tag Region, were  
835 retained from FlincG3. This *C. elegans* codon-optimized sensor, prepared by Genscript,  
836 was inserted into a worm-specific Fire vector, pPD95.75, which contains synthetic introns  
837 (SynIVS.A and SynIVS.L; blue) to facilitate expression, a multiple cloning site (MCS) and  
838 the 3' untranslated region of *unc-54* (*unc-54* 3' UTR; orange).

839

840 **Fig 2. WincG2 fluorescence increases upon stimulation of blue light-activated**  
841 **guanylyl cyclases when coexpressed in body wall muscle cells.**

842 (A) BeCyclOp is a fungal blue light-activated guanylyl cyclase that generates cGMP with  
843 a turnover rate of approximately  $17 \text{ cGMP s}^{-1}$  at  $20^\circ\text{C}$  [24].

844 (B)  $(F-F_0)/F_0$  for WincG2 fluorescence intensity in *myo-3p::CyclOp::SL2::mCherry; myo-*  
845 *3p::WincG2* animals grown in the absence and presence of all-*trans* retinal (ATR).  $n=6$   
846 for WincG2 fluorescence intensity without ATR (light green, bottom);  $n=5$  for WincG2  
847 fluorescence intensity with ATR (dark green, top). Inset shows raw traces and indicates

848  $F_0$ . (C) bPGC is a bacterial blue light-activated guanylyl cyclase containing a BLUF (blue  
849 light receptor using FAD) domain with an estimated turnover rate of  $0.2 \text{ cGMP s}^{-1}$  [28].

850 (D)  $(F-F_0)/F_0$  for WincG2 fluorescence intensity in *myo-3p::bPGC::SL2::mCherry; myo-*  
851 *3p::WincG2* animals ( $n=5$ , 27 ROIs). Inset shows raw traces and indicates  $F_0$ . (E) bPAC  
852 is a bacterial blue-light activated adenylyl cyclase containing a BLUF (blue light receptor  
853 using FAD) domain. *In vitro* cAMP production in the presence of blue light is  $10 \pm 2 \text{ nmol}$   
854  $\text{cAMP per minute per mg}$  [31]. (F)  $(F-F_0)/F_0$  for WincG2 fluorescence intensity in *myo-*  
855 *3p::bPAC::SL2::mCherry, myo-3p::WincG2* animals.  $n=7$ . Inset shows average of traces  
856 during the first two seconds of recording.

857

858 **Fig 3. WincG2 fluorescence in the ASER cell body changes linearly in response to**  
859 **50 mM NaCl step changes and depends on the receptor guanylyl cyclase GCY-22.**

860 (A) Average fluorescence response ( $\Delta F/F_0$ ) of WincG2 in ASER cell body shown as  
861 traces responding to either 10 second steps between 50 and 0 mM NaCl or switch control  
862 (represented at the bottom of the panel). WincG2 fluorescence in wild-type (N2) animals

863 decreases linearly in response to a 50 to 0 mM NaCl downstep and stops decreasing in  
864 response to a 0 to 50 mM NaCl upstep (blue trace, bottom). These responses are not  
865 seen in *gcy-22(tm2364)* animals (teal trace, middle) or when wild-type animals are  
866 exposed to switch control (pink trace, top).  $n=17$ ,  $n=23$  and  $n=11$  for wild-type, *gcy-*  
867 *22(tm2364)* and wild-type switch control, respectively. Regression analysis was applied  
868 to the data for the first 50 to 0 mM NaCl downstep.  $R^2 = 0.9962$ ,  $R^2 = 0.0436$  and  $R^2 =$   
869  $0.1515$  for wild-type, *gcy-22 (tm2364)* and wild-type switch control, respectively. (B)  
870 WincG2 fluorescence in the ASER cell body decreases in response to a 50 to 0 mM NaCl  
871 downstep and stops decreasing in response to a 0 to 50 mM NaCl upstep in wild-type  
872 animals. The slopes for the first 50 to 0 mM NaCl downstep between wild-type and *gcy-*  
873 *22(tm2364)* animals are different ( $n = 17$  (first set, blue; wild-type),  $n=23$  (fifth set, teal;  
874 *gcy-22*); permutation test  $p<0.00001$ ). In wild-type animals, the slopes in response to the  
875 first 50 to 0 mM NaCl down step are also different from those of the switch control ( $n= 17$   
876 (first set, blue; 50 mM NaCl downstep),  $n=11$  (third set, pink; switch control); permutation  
877 test  $p<0.00001$ ). The slope values between the first 50 to 0 mM NaCl downstep and 0 to  
878 50 mM NaCl upstep are different in wild-type animals ( $n=17$ ; first pair, blue; permutation  
879 test  $p<0.00001$ ), as compared to those of the switch control in wild-type animals and *gcy-*  
880 *22* animals, which were not different ( $n=11$ ; second pair, pink and  $n=23$ ; third pair, teal,  
881 respectively). See Materials and Methods for details of statistical analysis. (C) WincG2  
882 fluorescence in the ASER cell body increases in response to the second 0 to 50mM NaCl  
883 upstep in wild-type animals. The slopes for the second 0 to 50 mM NaCl upstep between  
884 wild-type and *gcy-22(tm2364)* animals are different ( $n = 17$  (blue; wild-type),  $n=23$  (teal;  
885 *gcy-22*); permutation test  $p<0.05$ ). In wild-type animals, the slopes in response to the



886 second 0 to 50 mM NaCl upstep are also different from those of the switch control (n= 17  
887 (blue; 50 mM NaCl downstep), n=11 (pink; switch control); permutation test  $p < 0.0001$ ).

888

889 **Fig 4. WincG2 expression in ASE does not affect reporter activity but can**  
890 **increase NaCl seeking behavior.**

891 (A) Animals were tested for NaCl cultivation preference adapted from lino [18]. Briefly,  
892 animals were placed on cultivation plates with various NaCl concentrations for around six  
893 hours before being placed on an assay plate with regions of higher and lower NaCl  
894 concentration. (B) Wild-type animals injected with 15 ng/ $\mu$ l *flp-6p::WincG2* exhibited a  
895 preference for higher [NaCl] while maintaining behavioral plasticity; animals from this line  
896 were recorded and analyzed for panels C, D, and E. Wild-type animals cultivated at 25mM  
897 NaCl, 50mM NaCl, and 100mM NaCl have a chemotaxis index (CI) approaching -1, 0 and  
898 0.75, respectively (first three bars). The line injected with 15 ng/ $\mu$ l *flp-6p::WincG2*  
899 produces two types of progeny: those that do not express the array (nontransgenic  
900 siblings) and those that do (transgenic siblings). Nontransgenic siblings behave like wild-  
901 type animals (second three bars) (Welch's t test, ns). Transgenic animals cultivated at  
902 each NaCl concentration exhibit a slight but not significant preference for higher NaCl  
903 concentration relative to wild-type animals (Welch's t test, ns). (C) Average fluorescence  
904 response ( $\Delta F/F_0$ ) of WincG2 in ASER cell body shown as traces responding to ten 10  
905 second steps between 50 and 0 mM NaCl (represented at the bottom of the panel).  
906 WincG2 fluorescence in wild-type (N2) animals decreases linearly in response to a 50 to  
907 0 mM NaCl downstep and stops decreasing in response to a 0 to 50 mM NaCl upstep;  
908 this is seen in animals injected with either 7.5 ng/ $\mu$ l (top trace; blue) or 15 ng/ $\mu$ l (bottom

909 trace; red) *flp-6p::WincG2*. The data for the strain injected with 7.5 ng/ $\mu$ l *flp-6p::WincG2*  
910 are the same data that was used in Fig 4A as wild-type (N2). Regression analysis was  
911 applied to the data for the first 50 to 0 mM NaCl downstep.  $R^2 = 0.9962$  and  $R^2 = 0.9963$   
912 for wild type animals injected with 7.5 ng/ $\mu$ l and 15 ng/ $\mu$ l *flp-6p::WincG2*, respectively. (D)  
913 The slope values of the first 50 to 0 mM NaCl downstep and 0 to 50 mM NaCl upstep are  
914 different in wild-type animals injected with either 7.5 ng/ $\mu$ l (n=17; first pair, blue;  
915 permutation test  $p < 0.00001$ ) or 15 ng/ $\mu$ l (n=18; second pair, red; permutation test  
916  $p < 0.00001$ ) *flp-6p::WincG2*. The data for the strain injected with 7.5 ng/ $\mu$ l *flp-6p::WincG2*  
917 are the same as the data used in Fig 4B as wild-type, first pair, blue. The slopes for the  
918 first 50 to 0 mM NaCl downstep in wild-type animals injected at 7.5 ng/ $\mu$ l and 15 ng/ $\mu$ l *flp-*  
919 *6p::WincG2* are not different (n = 17 (blue; 7.5 ng/ $\mu$ l), n=18 (red; 15 ng/ $\mu$ l); permutation  
920 test ns).

921

922

923 **Fig 5. WincG2 allows visualization of cGMP production in PHB chemosensory**  
924 **neurons in response to the repellent SDS.**

925 (A) Diagram of the PHB circuit [19,32,33]. The primary postsynaptic partners of PHB  
926 neurons are the AVA backward command interneurons and the PVC forward command  
927 interneurons. (B) Diagram of the sodium dodecyl sulfate (SDS) behavioral assay, which  
928 tests the PHB circuit response to 1 mM SDS [19,32,33]. Animals are induced to move  
929 backwards with a nose touch from a hair pick. A drop of 1 mM SDS is placed behind  
930 them on a dry NGM plate, so that the drop quickly absorbs into the media, preventing  
931 wicking along the worm. The time that the animal backs into the drop before stopping is

932 measured. (C) WincG2 does not affect the response of animals to SDS. For reference,  
933 loss of *tax-4* cyclic nucleotide-gated channel causes a severe defect in the ability to sense  
934 SDS [32]. (D) When WincG2 is expressed in PHB neurons,  $\Delta F/F_0$  increases steadily after  
935 introduction of 1mM SDS. n=16 (E) The area under the curve for traces before and after  
936 SDS presentation is different (permutation test,  $p < -0.00001$ ).

937

### 938 **Supporting Information Captions**

939

940 **S1 Fig. Coexpression of bPGC with the cGMP-gated cation channel TAX-2/TAX-4 in**  
941 **body wall muscle cells results in muscle contraction within two seconds upon**  
942 **exposure to blue light (n=10).** bPGC(K265D) contains a point mutation that abolishes  
943 guanylyl cyclase activity. Animals coexpressing bPGC(K265D) with TAX-2/TAX-4 did not  
944 contract to the same extent (n=12).

945

946 **S2 Fig. WincG2 fluorescence in the ASER cell body increases in response to the**  
947 **third and fourth 0 to 50mM NaCl upstep in wild-type animals.** The difference in slopes  
948 for the third and fourth 0 to 50 mM NaCl upstep between wild-type and *gcy-22(tm2364)*  
949 animals is significant (n = 17 (blue; wild-type), n=23 (teal; *gcy-22*); permutation test  
950  $p < 0.05$  for third upstep and  $p < 0.01$  for fourth upstep). In wild-type animals, the difference  
951 between the slopes in response to the third and fourth 0 to 50 mM NaCl upstep is also  
952 significant from those of the switch control (n= 17 (blue; wild-type), n=11 (pink; switch  
953 control); permutation test  $p < 0.01$ ).

954

955 **S3 Fig. Other lines generated from injecting 15 ng/ $\mu$ l *flp-6p::WincG2* exhibit a**  
956 **preference for higher [NaCl] while maintaining behavioral plasticity.** This preference  
957 is significantly different from wild-type animals and nontransgenic siblings.

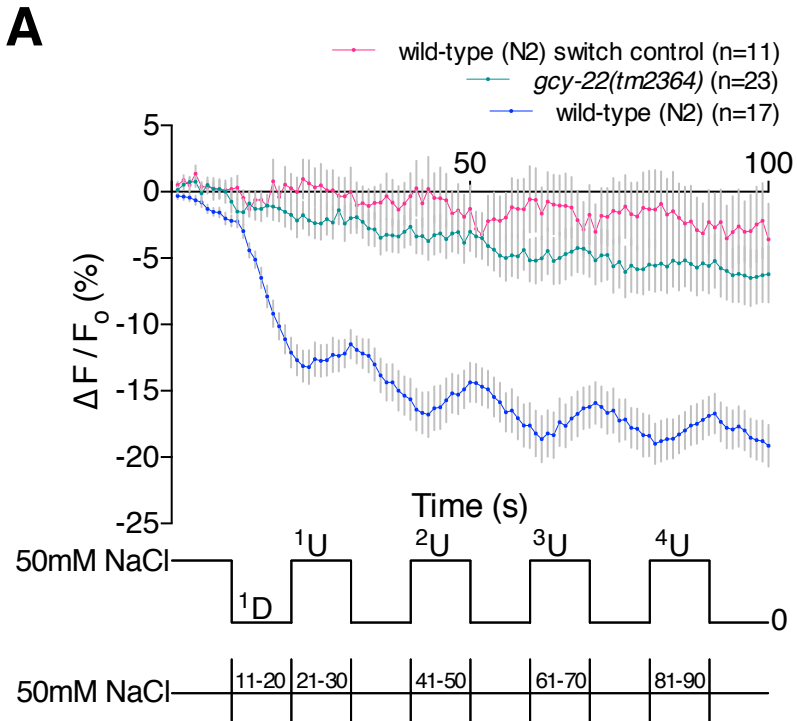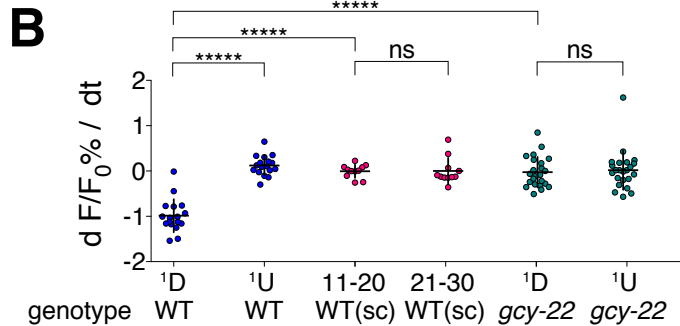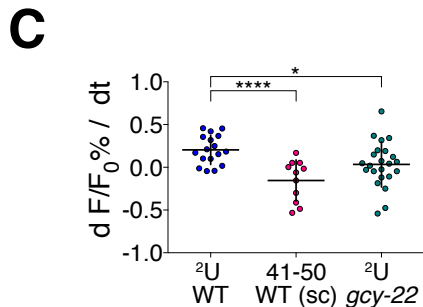

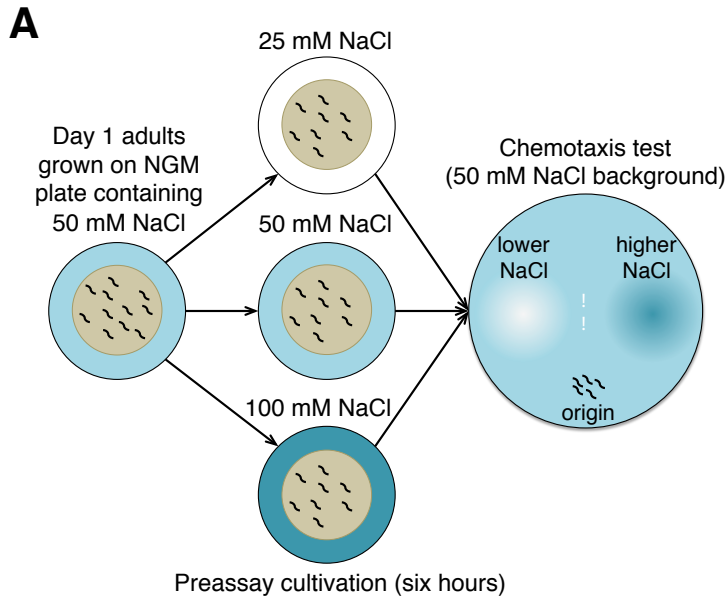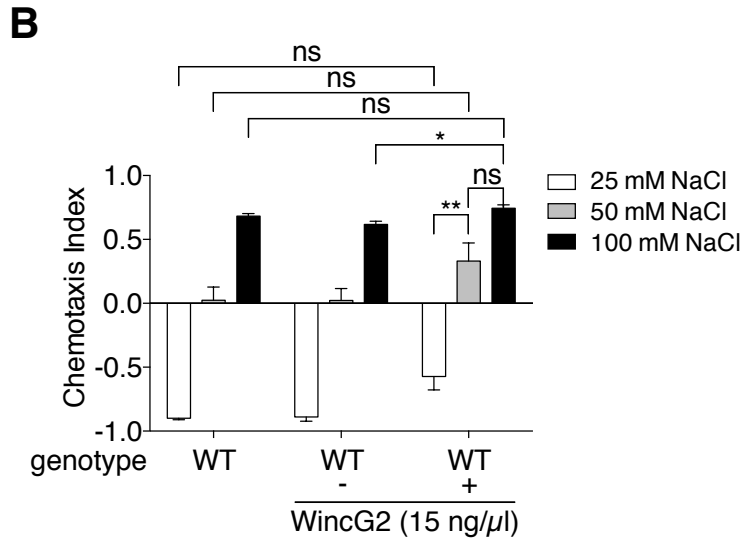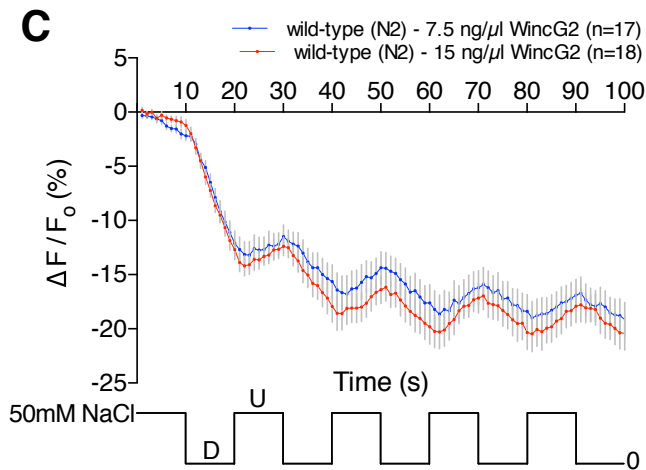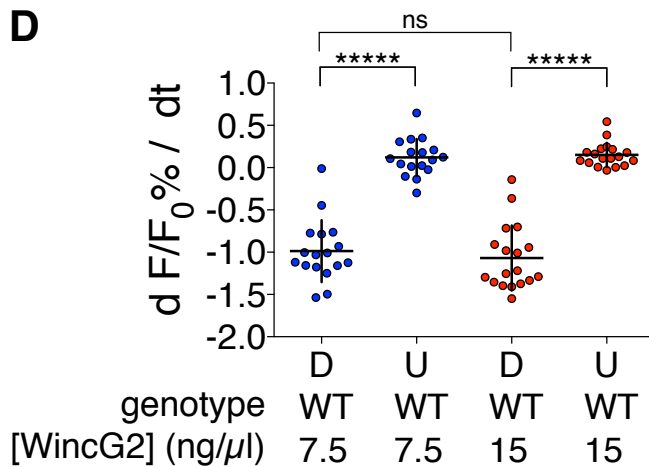

# WincG2

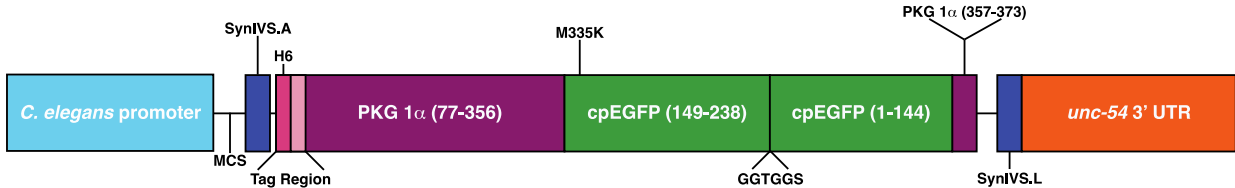

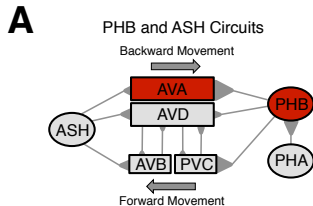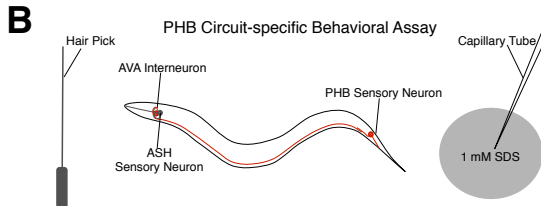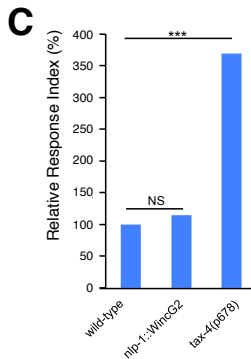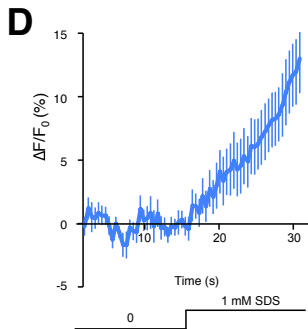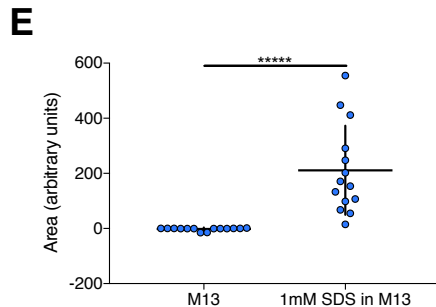



**A**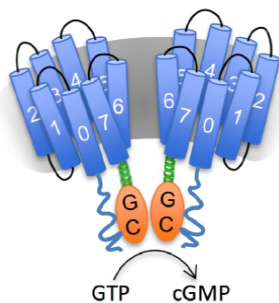**B**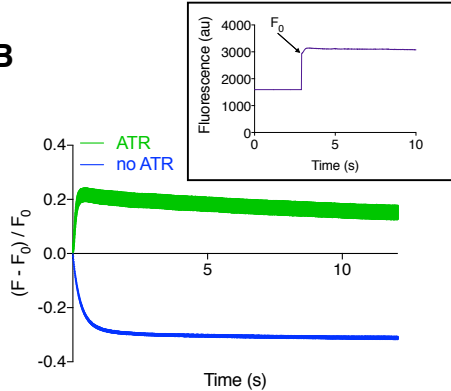**C**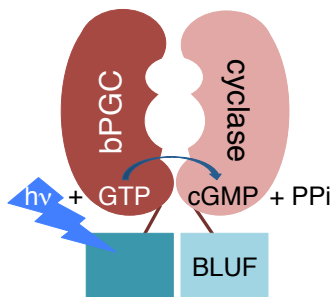**D**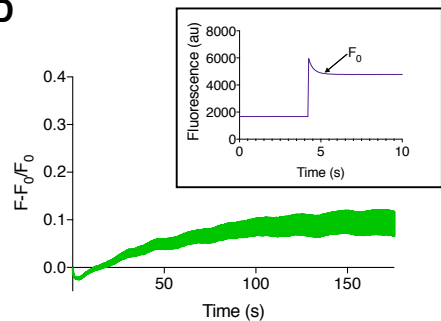**E**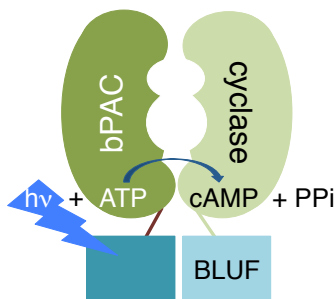**F**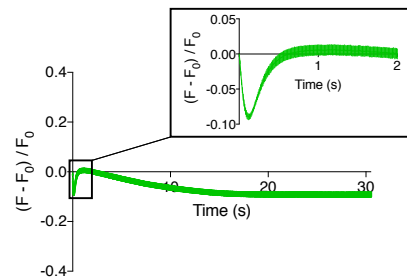

Source: https://biorxiv.org/content/biorxiv/early/2018/10/02/433425.full-text.pdf
